# Supplementary material for: Transforming Growth Factor-β Drives the Transendothelial Migration of Hepatocellular Carcinoma Cells
Source: PubMed Central journal article supplement (PMC5666801; doi:10.3390/ijms18102119), 2017-10-10
Supplement: ijms-18-02119-s001.pdf [file ijms-18-02119-s001.pdf]

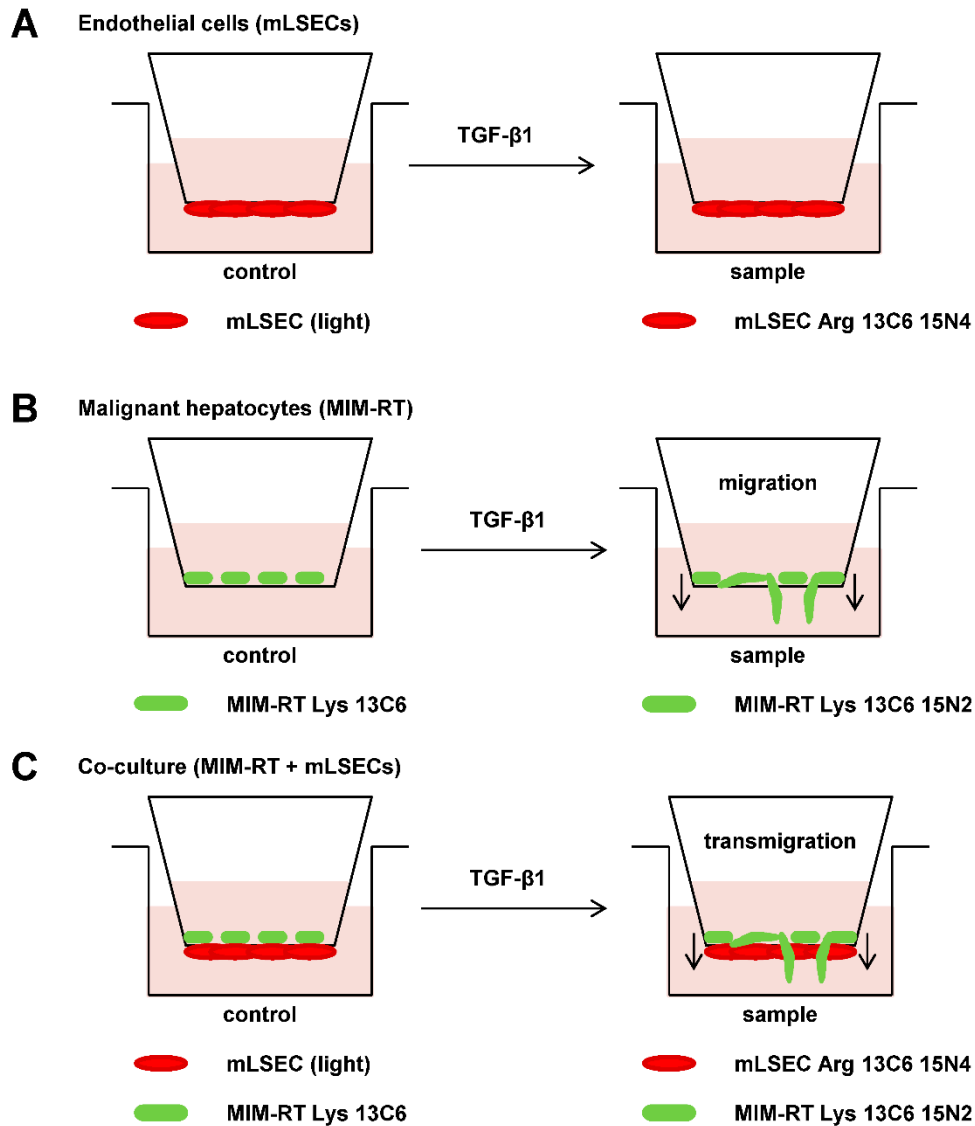

**Figure S1.** Experimental setup of SILAC-based mass spectrometry analysis. (A) Unlabeled endothelial cells serve as a control, whereas TGF- $\beta$ 1 treated cells were labeled with arginine 13C6 15N4. (B) Migration of MIM-RT cells labeled with lysine 13C6 as a control and lysine 13C6 15N2, respectively. (C) Transmigration of MIM-RT cells through endothelial mLSEC cells using four different SILAC labels. All SILAC-labeled cells were analyzed by mass spectrometry.

**Table S1.** Differentially expressed proteins in mLSEC treated with TGF- $\beta$ 1.

| Accession      | Description                                                      | Expression Ratio<br>Sample/Control |
|----------------|------------------------------------------------------------------|------------------------------------|
| Q9JIG8         | PRA1 family protein 2                                            | 1.84                               |
| Q60854         | Serpin B6                                                        | 1.72                               |
| Q9DBR7-2       | Isoform 2 of Protein phosphatase 1 regulatory subunit<br>12A     | 1.52                               |
| Q9D1J3         | SAP domain-containing ribonucleoprotein                          | 1.50                               |
| Q8K4Q8         | Collectin-12                                                     | 1.48                               |
| P24549         | Retinal dehydrogenase 1                                          | 1.45                               |
| P62320         | Small nuclear ribonucleoprotein Sm D3                            | 1.39                               |
| Q9D0I9         | Arginine--tRNA ligase_ cytoplasmic                               | 0.29                               |
| Q9WVJ3-2       | Isoform 2 of Carboxypeptidase Q                                  | 0.30                               |
| P61979         | Heterogeneous nuclear ribonucleoprotein K                        | 0.34                               |
| Q9CQ60         | 6-phosphogluconolactonase                                        | 0.48                               |
| Q9CQJ8         | NADH dehydrogenase [ubiquinone] 1 beta subcomplex<br>subunit 9   | 0.49                               |
| Q99020         | Heterogeneous nuclear ribonucleoprotein A/B                      | 0.51                               |
| Q60931         | Voltage-dependent anion-selective channel protein 3              | 0.52                               |
| J3KMM5         | Calcium-transporting ATPase                                      | 0.53                               |
| Q8K411-3       | Isoform 3 of Presequence protease_ mitochondrial                 | 0.54                               |
| A0A0B4J1<br>M9 | Microtubule-associated protein 4                                 | 0.55                               |
| P37040         | NADPH--cytochrome P450 reductase                                 | 0.55                               |
| P01027         | Complement C3                                                    | 0.56                               |
| E9QKZ2         | Importin-9                                                       | 0.56                               |
| Q99M71         | Mammalian ependymin-related protein 1                            | 0.56                               |
| Q9D7B7         | Probable glutathione peroxidase 8                                | 0.56                               |
| Q64727         | Vinculin                                                         | 0.56                               |
| A2A9X5         | 5'(3')-deoxyribonucleotidase_ cytosolic type                     | 0.57                               |
| Q61599         | Rho GDP-dissociation inhibitor 2                                 | 0.57                               |
| Q9Z2C6         | Uroplakin-1b                                                     | 0.57                               |
| Q8BIJ6         | Isoleucine--tRNA ligase_ mitochondrial                           | 0.58                               |
| P08003         | Protein disulfide-isomerase A4                                   | 0.58                               |
| O89023         | Tripeptidyl-peptidase 1                                          | 0.58                               |
| P61222         | ATP-binding cassette sub-family E member 1                       | 0.61                               |
| D3YW48         | Calpain small subunit 1 (Fragment)                               | 0.61                               |
| O09131         | Glutathione S-transferase omega-1                                | 0.61                               |
| Q9DCN2-2       | Isoform 2 of NADH-cytochrome b5 reductase 3                      | 0.61                               |
| P29758         | Ornithine aminotransferase_ mitochondrial                        | 0.61                               |
| Q8BXC0         | Prostacyclin synthase                                            | 0.61                               |
| Q5NCU4         | SPARC                                                            | 0.61                               |
| Q9CXW3         | Calcyclin-binding protein                                        | 0.62                               |
| B7ZJ1          | Fibronectin                                                      | 0.63                               |
| Q99KI0         | Aconitate hydratase_ mitochondrial                               | 0.64                               |
| Q99MN1         | Lysine--tRNA ligase                                              | 0.64                               |
| Q7TMF3         | NADH dehydrogenase [ubiquinone] 1 alpha<br>subcomplex subunit 12 | 0.64                               |
| Q99K94         | Signal transducer and activator of transcription                 | 0.64                               |
| P56380         | Bis(5'-nucleosyl)-tetraphosphatase [asymmetrical]                | 0.65                               |
| B1AWE0         | Clathrin light chain A                                           | 0.65                               |
| P09528         | Ferritin heavy chain                                             | 0.65                               |

|          |                                                                            |      |
|----------|----------------------------------------------------------------------------|------|
| Q504P4   | Heat shock cognate 71 kDa protein                                          | 0.65 |
| Q8BMS1   | Trifunctional enzyme subunit alpha_ mitochondrial                          | 0.65 |
| Q91ZJ5   | UTP--glucose-1-phosphate uridylyltransferase                               | 0.65 |
| Q9DBX5   | Cytosolic phospholipase A2                                                 | 0.66 |
| P45952   | Medium-chain specific acyl-CoA dehydrogenase_ mitochondrial                | 0.66 |
| Q9CQZ5   | NADH dehydrogenase [ubiquinone] 1 alpha subcomplex subunit 6               | 0.66 |
| Q5SQB0   | Nucleophosmin                                                              | 0.66 |
| Q3TXS7   | 26S proteasome non-ATPase regulatory subunit 1                             | 0.67 |
| P62855   | 40S ribosomal protein S26                                                  | 0.67 |
| P47738   | Aldehyde dehydrogenase_ mitochondrial                                      | 0.67 |
| Q64133   | Amine oxidase [flavin-containing] A                                        | 0.67 |
| P60766   | Cell division control protein 42 homolog                                   | 0.67 |
| O88544   | COP9 signalosome complex subunit 4                                         | 0.67 |
| P62897   | Cytochrome c_ somatic                                                      | 0.67 |
| P70372   | ELAV-like protein 1                                                        | 0.67 |
| P70699   | Lysosomal alpha-glucosidase                                                | 0.67 |
| P07742   | Ribonucleoside-diphosphate reductase large subunit                         | 0.67 |
| Q9R0P3   | S-formylglutathione hydrolase                                              | 0.67 |
| Q921L3   | Transmembrane and coiled-coil domain-containing protein 1                  | 0.67 |
| Q9WUL7   | ADP-ribosylation factor-like protein 3                                     | 0.68 |
| Q922B2   | Aspartate--tRNA ligase_ cytoplasmic                                        | 0.68 |
| Q9Z2W0   | Aspartyl aminopeptidase                                                    | 0.68 |
| Q922D8   | C-1-tetrahydrofolate synthase_ cytoplasmic                                 | 0.68 |
| O08749   | Dihydrolipoyl dehydrogenase_ mitochondrial                                 | 0.68 |
| Q9ER72-2 | Isoform 2 of Cysteine--tRNA ligase_ cytoplasmic                            | 0.68 |
| Q9EQ20   | Methylmalonate-semialdehyde dehydrogenase [acylating]_ mitochondrial       | 0.68 |
| O55131   | Septin-7                                                                   | 0.68 |
| P28653   | Biglycan                                                                   | 0.69 |
| Q01149   | Collagen alpha-2(I) chain                                                  | 0.69 |
| Q3UJB0   | Protein Sf3b2                                                              | 0.69 |
| A0A087W  | Transcription elongation factor B polypeptide 1                            | 0.69 |
| QE6      | (Fragment)                                                                 |      |
| Q99KK7   | Dipeptidyl peptidase 3                                                     | 0.70 |
| E9QN08   | Elongation factor 1-delta (Fragment)                                       | 0.70 |
| Q9EQK5   | Major vault protein                                                        | 0.70 |
| Q9DC70   | NADH dehydrogenase [ubiquinone] iron-sulfur protein 7_ mitochondrial       | 0.70 |
| Q3THS6   | S-adenosylmethionine synthase isoform type-2                               | 0.70 |
| Q64737   | Trifunctional purine biosynthetic protein adenosine-3                      | 0.70 |
| O88342   | WD repeat-containing protein 1                                             | 0.70 |
| Q9CPY7   | Cytosol aminopeptidase                                                     | 0.71 |
| Q99K01-3 | Isoform 3 of Pyridoxal-dependent decarboxylase domain-containing protein 1 | 0.71 |
| P52480   | Pyruvate kinase PKM                                                        | 0.71 |
| Q9CQA3   | Succinate dehydrogenase [ubiquinone] iron-sulfur subunit_ mitochondrial    | 0.71 |
| H3BJY1   | Synaptogyrin-2                                                             | 0.71 |
| Q80YF6   | Uroplakin-3b                                                               | 0.71 |

|          |                                                                                   |      |
|----------|-----------------------------------------------------------------------------------|------|
| Q63829   | COMM domain-containing protein 3                                                  | 0.72 |
| Q9DBF1-2 | Isoform 2 of Alpha-aminoadipic semialdehyde dehydrogenase                         | 0.72 |
| P11983-2 | Isoform 2 of T-complex protein 1 subunit alpha                                    | 0.72 |
| P97807-2 | Isoform Cytoplasmic of Fumarate hydratase_ mitochondrial                          | 0.72 |
| A2AIW9   | Mitochondrial-processing peptidase subunit alpha                                  | 0.72 |
| P22437   | Prostaglandin G/H synthase 1                                                      | 0.72 |
| Q62465   | Synaptic vesicle membrane protein VAT-1 homolog                                   | 0.72 |
| H3BKL5   | 3-ketoacyl-CoA thiolase A_ peroxisomal                                            | 0.73 |
| P40124   | Adenylyl cyclase-associated protein 1                                             | 0.73 |
| D3YYT0   | Cadherin-2                                                                        | 0.73 |
| D3Z368   | Calcium/calmodulin-dependent protein kinase type 1 (Fragment)                     | 0.73 |
| Q8VI75   | Importin-4                                                                        | 0.73 |
| Q78IK4   | MICOS complex subunit Mic27                                                       | 0.73 |
| D3YXC2   | Mitochondrial carrier homolog 1 (Fragment)                                        | 0.73 |
| Q9D358-2 | Isoform 2 of Low molecular weight phosphotyrosine protein phosphatase             | 0.74 |
| Q91VS7   | Microsomal glutathione S-transferase 1                                            | 0.74 |
| O55125   | Protein NipSnap homolog 1                                                         | 0.74 |
| A2A547   | Ribosomal protein L19                                                             | 0.74 |
| P57746   | V-type proton ATPase subunit D                                                    | 0.74 |
| P35564   | Calnexin                                                                          | 0.75 |
| Q02248   | Catenin beta-1                                                                    | 0.75 |
| Q7JCZ1   | Cytochrome c oxidase subunit 2                                                    | 0.75 |
| Q62425   | Cytochrome c oxidase subunit NDUFA4                                               | 0.75 |
| O55022   | Membrane-associated progesterone receptor component 1                             | 0.75 |
| P35700   | Peroxiredoxin-1                                                                   | 0.75 |
| Q8VEM8   | Phosphate carrier protein_ mitochondrial                                          | 0.75 |
| Q543K9   | Purine nucleoside phosphorylase                                                   | 0.75 |
| Q8VEE0   | Ribulose-phosphate 3-epimerase                                                    | 0.75 |
| P62715   | Serine/threonine-protein phosphatase 2A catalytic subunit beta isoform            | 0.75 |
| P80313   | T-complex protein 1 subunit eta                                                   | 0.75 |
| P12970   | 60S ribosomal protein L7a                                                         | 0.76 |
| O08529   | Calpain-2 catalytic subunit                                                       | 0.76 |
| Q3T9X3   | Dynamin-2                                                                         | 0.76 |
| P10126   | Elongation factor 1-alpha 1                                                       | 0.76 |
| Q8C253   | Galectin                                                                          | 0.76 |
| Q76MZ3   | Serine/threonine-protein phosphatase 2A 65 kDa regulatory subunit A alpha isoform | 0.76 |
| A2AUM6   | Signal recognition particle 14 kDa protein                                        | 0.76 |
| Q9WV55   | Vesicle-associated membrane protein-associated protein A                          | 0.76 |
| Q9CPQ8   | ATP synthase subunit g_ mitochondrial                                             | 0.77 |
| Q99JZ4   | GTP-binding protein SAR1a                                                         | 0.77 |
| O88587-2 | Isoform Soluble of Catechol O-methyltransferase                                   | 0.77 |
| E9PZF0   | Nucleoside diphosphate kinase                                                     | 0.77 |
| Q01853   | Transitional endoplasmic reticulum ATPase                                         | 0.77 |
| Q9CZ04   | COP9 signalosome complex subunit 7a                                               | 0.78 |

|          |                                                                         |      |
|----------|-------------------------------------------------------------------------|------|
| Q8BKC5   | Importin-5                                                              | 0.78 |
| Q99PT1   | Rho GDP-dissociation inhibitor 1                                        | 0.78 |
| F8WHP8   | ATP synthase subunit f_ mitochondrial                                   | 0.79 |
| G5E850   | Cytochrome b-5_ isoform CRA_a                                           | 0.79 |
| P16045   | Galectin-1                                                              | 0.79 |
| Q9DCF9-2 | Isoform 2 of Translocon-associated protein subunit<br>gamma             | 0.79 |
| Q8BJS4-3 | Isoform 3 of SUN domain-containing protein 2                            | 0.79 |
| P99024   | Tubulin beta-5 chain                                                    | 0.79 |
| Q8BYA0   | Tubulin-specific chaperone D                                            | 0.79 |
| Q9CZU6   | Citrate synthase_ mitochondrial                                         | 0.80 |
| P00493   | Hypoxanthine-guanine phosphoribosyltransferase                          | 0.80 |
| Q9D071-3 | Isoform 3 of MMS19 nucleotide excision repair protein<br>homolog        | 0.80 |
| Q9DCL9   | Multifunctional protein ADE2                                            | 0.80 |
| Q99JR1   | Sideroflexin-1                                                          | 0.80 |
| P20108   | Thioredoxin-dependent peroxide reductase_<br>mitochondrial              | 0.80 |
| Q99KC8   | von Willebrand factor A domain-containing protein 5A                    | 0.80 |
| Q9WVJ2   | 26S proteasome non-ATPase regulatory subunit 13                         | 0.81 |
| Q8VDM4   | 26S proteasome non-ATPase regulatory subunit 2                          | 0.81 |
| Q8VDD5   | Myosin-9                                                                | 0.81 |
| Q9DCT2   | NADH dehydrogenase [ubiquinone] iron-sulfur protein<br>3_ mitochondrial | 0.81 |
| Q8K310   | Matrin-3                                                                | 0.84 |

---

**Table S2.** Differentially expressed proteins in MIM-RT cells treated with TGF- $\beta$ 1.

| <b>Uniprot ID</b> | <b>Description</b>                                                | <b>Expression Ratio Sample/Control</b> |
|-------------------|-------------------------------------------------------------------|----------------------------------------|
| P60229            | Eukaryotic translation initiation factor 3 subunit E              | 1.66                                   |
| P62849            | 40S ribosomal protein S24                                         | 1.41                                   |
| Q9CQQ7            | ATP synthase F(0) complex subunit B1_ mitochondrial               | 1.38                                   |
| P47754            | F-actin-capping protein subunit alpha-2                           | 1.36                                   |
| Q9JJI8            | 60S ribosomal protein L38                                         | 1.35                                   |
| Q99020            | Heterogeneous nuclear ribonucleoprotein A/B                       | 1.35                                   |
| Q6ZWZ7            | 60S ribosomal protein L17                                         | 1.32                                   |
| Q9JKB3-2          | Isoform 2 of Y-box-binding protein 3                              | 1.32                                   |
| Q9WVA4            | Transgelin-2                                                      | 1.30                                   |
| P20029            | 78 kDa glucose-regulated protein                                  | 1.27                                   |
| P07091            | Protein S100-A4                                                   | 1.27                                   |
| P68040            | Guanine nucleotide-binding protein subunit beta-2-like 1          | 1.26                                   |
| Q91WK2            | Eukaryotic translation initiation factor 3 subunit H              | 1.25                                   |
| P14602-2          | Isoform B of Heat shock protein beta-1                            | 1.25                                   |
| P09528            | Ferritin heavy chain                                              | 0.55                                   |
| P11679            | Keratin_ type II cytoskeletal 8                                   | 0.63                                   |
| Q9CQX2            | Cytochrome b5 type B                                              | 0.65                                   |
| Q6PB66            | Leucine-rich PPR motif-containing protein_ mitochondrial          | 0.66                                   |
| P51660            | Peroxisomal multifunctional enzyme type 2                         | 0.68                                   |
| P10649            | Glutathione S-transferase Mu 1                                    | 0.71                                   |
| P99029-2          | Isoform Cytoplasmic+peroxisomal of Peroxiredoxin-5_ mitochondrial | 0.71                                   |
| Q64674            | Spermidine synthase                                               | 0.73                                   |
| P59325            | Eukaryotic translation initiation factor 5                        | 0.74                                   |
| Q9DCD0            | 6-phosphogluconate dehydrogenase_ decarboxylating                 | 0.77                                   |
| E9Q616            | Protein Ahnak                                                     | 0.78                                   |
| P50247            | Adenosylhomocysteinase                                            | 0.79                                   |
| P50580-2          | Isoform 2 of Proliferation-associated protein 2G4                 | 0.79                                   |

**Table S3.** Differentially expressed proteins during transmigration of mLSECs.

| <b>Uniprot ID</b> | <b>Description</b>                                                   | <b>Expression Ratio Sample/Control</b> |
|-------------------|----------------------------------------------------------------------|----------------------------------------|
| Q02819            | Nucleobindin-1                                                       | 1.25                                   |
| Q66GT5            | Phosphatidylglycerophosphatase and protein-tyrosine phosphatase 1    | 1.20                                   |
| Q61937            | Nucleophosmin                                                        | 0.22                                   |
| Q9R0P3            | S-formylglutathione hydrolase                                        | 0.25                                   |
| Q9QYJ0            | DnaJ homolog subfamily A member 2                                    | 0.26                                   |
| O09131            | Glutathione S-transferase omega-1                                    | 0.26                                   |
| A2BE93            | Protein SET (Fragment)                                               | 0.26                                   |
| P14206            | 40S ribosomal protein SA                                             | 0.27                                   |
| P08030            | Adenine phosphoribosyltransferase                                    | 0.27                                   |
| Q6GT24            | Peroxiredoxin 6                                                      | 0.28                                   |
| Q9R1Q7            | Proteolipid protein 2                                                | 0.28                                   |
| Q9CX56            | 26S proteasome non-ATPase regulatory subunit 8                       | 0.29                                   |
| P05201            | Aspartate aminotransferase_ cytoplasmic                              | 0.30                                   |
| P07901            | Heat shock protein HSP 90-alpha                                      | 0.30                                   |
| Q9ER72-2          | Isoform 2 of Cysteine--tRNA ligase_ cytoplasmic                      | 0.30                                   |
| P16546-2          | Isoform 2 of Spectrin alpha chain_ non-erythrocytic 1                | 0.30                                   |
| Q9DC70            | NADH dehydrogenase [ubiquinone] iron-sulfur protein 7_ mitochondrial | 0.30                                   |
| Q9CQR4            | Acyl-coenzyme A thioesterase 13                                      | 0.31                                   |
| P70168            | Importin subunit beta-1                                              | 0.31                                   |
| Q8BJY1            | 26S proteasome non-ATPase regulatory subunit 5                       | 0.32                                   |
| E9Q242            | Adenylosuccinate lyase                                               | 0.32                                   |
| Q9CQX2            | Cytochrome b5 type B                                                 | 0.32                                   |
| Q80X90            | Filamin-B                                                            | 0.32                                   |
| P52293            | Importin subunit alpha-1                                             | 0.32                                   |
| Q9QXS1-15         | Isoform PLEC-1H of Plectin                                           | 0.32                                   |
| A2AIW9            | Mitochondrial-processing peptidase subunit alpha                     | 0.32                                   |
| Q60854            | Serpin B6                                                            | 0.32                                   |
| Q8BP47            | Asparagine--tRNA ligase_ cytoplasmic                                 | 0.33                                   |
| Q8C166            | Copine-1                                                             | 0.33                                   |
| E9PWE8            | Dihydropyrimidinase-related protein 3                                | 0.33                                   |
| Q8BL66            | Early endosome antigen 1                                             | 0.33                                   |
| P60229            | Eukaryotic translation initiation factor 3 subunit E                 | 0.33                                   |
| P16858            | Glyceraldehyde-3-phosphate dehydrogenase                             | 0.33                                   |
| P52760            | Ribonuclease UK114                                                   | 0.33                                   |
| Q62465            | Synaptic vesicle membrane protein VAT-1 homolog                      | 0.33                                   |
| Q9D0R2            | Threonine--tRNA ligase_ cytoplasmic                                  | 0.33                                   |
| G3UZ34            | 116 kDa U5 small nuclear ribonucleoprotein component                 | 0.34                                   |
| P46664            | Adenylosuccinate synthetase isozyme 2                                | 0.34                                   |
| P35564            | Calnexin                                                             | 0.34                                   |
| O55135            | Eukaryotic translation initiation factor 6                           | 0.34                                   |
| Q9CZD3            | Glycine--tRNA ligase                                                 | 0.34                                   |

|          |                                                                                                          |      |
|----------|----------------------------------------------------------------------------------------------------------|------|
| P24547   | Inosine-5'-monophosphate dehydrogenase 2                                                                 | 0.34 |
| Q9Z110-2 | Isoform Short of Delta-1-pyrroline-5-carboxylate synthase                                                | 0.34 |
| A2AT02   | NSFL1 cofactor p47                                                                                       | 0.34 |
| O54724   | Polymerase I and transcript release factor                                                               | 0.34 |
| Q9R0X4   | Acyl-coenzyme A thioesterase 9_ mitochondrial                                                            | 0.35 |
| Q8BGQ7   | Alanine--tRNA ligase_ cytoplasmic                                                                        | 0.35 |
| P11499   | Heat shock protein HSP 90-beta                                                                           | 0.35 |
| P48678   | Prelamin-A/C                                                                                             | 0.35 |
| Q8VEE0   | Ribulose-phosphate 3-epimerase                                                                           | 0.35 |
| P68372   | Tubulin beta-4B chain                                                                                    | 0.35 |
| P63325   | 40S ribosomal protein S10                                                                                | 0.36 |
| Q9WUL7   | ADP-ribosylation factor-like protein 3                                                                   | 0.36 |
| P60843   | Eukaryotic initiation factor 4A-I                                                                        | 0.36 |
| Q8C854   | Myelin expression factor 2                                                                               | 0.36 |
| Q9CPP0   | Nucleoplasmin-3                                                                                          | 0.36 |
| Q9JKF1   | Ras GTPase-activating-like protein IQGAP1                                                                | 0.36 |
| A2A547   | Ribosomal protein L19                                                                                    | 0.36 |
| P68369   | Tubulin alpha-1A chain                                                                                   | 0.36 |
| E9PYI8   | Ubiquitin carboxyl-terminal hydrolase                                                                    | 0.36 |
| Q5RKN9   | Capping protein (Actin filament) muscle Z-line_ alpha 1                                                  | 0.37 |
| P57776   | Elongation factor 1-delta                                                                                | 0.37 |
| P62827   | GTP-binding nuclear protein Ran                                                                          | 0.37 |
| P00493   | Hypoxanthine-guanine phosphoribosyltransferase                                                           | 0.37 |
| Q791T5-2 | Isoform 2 of Mitochondrial carrier homolog 1                                                             | 0.37 |
| Q9CYG7   | Mitochondrial import receptor subunit TOM34                                                              | 0.37 |
| Q91YZ8   | Polyadenylate-binding protein                                                                            | 0.37 |
| P62264   | 40S ribosomal protein S14                                                                                | 0.38 |
| P62843   | 40S ribosomal protein S15                                                                                | 0.38 |
| Q9JMJ4   | 5'(3')-deoxyribonucleotidase_ cytosolic type                                                             | 0.38 |
| P47911   | 60S ribosomal protein L6                                                                                 | 0.38 |
| Q9EST5   | Acidic leucine-rich nuclear phosphoprotein 32 family member B                                            | 0.38 |
| Q9D898   | Actin-related protein 2/3 complex subunit 5-like protein                                                 | 0.38 |
| E9QNN1   | ATP-dependent RNA helicase A                                                                             | 0.38 |
| Q8BMF4   | Dihydrolipoyllysine-residue acetyltransferase component of pyruvate dehydrogenase complex_ mitochondrial | 0.38 |
| P23116   | Eukaryotic translation initiation factor 3 subunit A                                                     | 0.38 |
| Q9DCH4   | Eukaryotic translation initiation factor 3 subunit F                                                     | 0.38 |
| Q8BKC5   | Importin-5                                                                                               | 0.38 |
| P50580-2 | Isoform 2 of Proliferation-associated protein 2G4                                                        | 0.38 |
| P60335   | Poly(rC)-binding protein 1                                                                               | 0.38 |
| P99026   | Proteasome subunit beta type-4                                                                           | 0.38 |
| Q62093   | Serine/arginine-rich splicing factor 2                                                                   | 0.38 |
| Q64674   | Spermidine synthase                                                                                      | 0.38 |
| P26516   | 26S proteasome non-ATPase regulatory subunit 7                                                           | 0.39 |
| P97351   | 40S ribosomal protein S3a                                                                                | 0.39 |
| P47963   | 60S ribosomal protein L13                                                                                | 0.39 |



|          |                                                                                |      |
|----------|--------------------------------------------------------------------------------|------|
| P19253   | 60S ribosomal protein L13a                                                     | 0.39 |
| Q9CR57   | 60S ribosomal protein L14                                                      | 0.39 |
| P12970   | 60S ribosomal protein L7a                                                      | 0.39 |
| P40124   | Adenylyl cyclase-associated protein 1                                          | 0.39 |
| P07356   | Annexin A2                                                                     | 0.39 |
| O08749   | Dihydrolipoyl dehydrogenase_ mitochondrial                                     | 0.39 |
| O70194   | Eukaryotic translation initiation factor 3 subunit D                           | 0.39 |
| Q9D6R2   | Isocitrate dehydrogenase [NAD] subunit alpha_ mitochondrial                    | 0.39 |
| Q61990   | Poly(rC)-binding protein 2                                                     | 0.39 |
| Q9Z2U0   | Proteasome subunit alpha type-7                                                | 0.39 |
| Q9Z2I9   | Succinyl-CoA ligase [ADP-forming] subunit beta_ mitochondrial                  | 0.39 |
| P26039   | Talin-1                                                                        | 0.39 |
| P80317   | T-complex protein 1 subunit zeta                                               | 0.39 |
| E9Q5I9   | 26S proteasome non-ATPase regulatory subunit 13                                | 0.40 |
| Q8VDM4   | 26S proteasome non-ATPase regulatory subunit 2                                 | 0.40 |
| P62852   | 40S ribosomal protein S25                                                      | 0.40 |
| P62242   | 40S ribosomal protein S8                                                       | 0.40 |
| P35979   | 60S ribosomal protein L12                                                      | 0.40 |
| Q9CQM8   | 60S ribosomal protein L21                                                      | 0.40 |
| P59999   | Actin-related protein 2/3 complex subunit 4                                    | 0.40 |
| P48036   | Annexin A5                                                                     | 0.40 |
| Q9D8N0   | Elongation factor 1-gamma                                                      | 0.40 |
| P63242   | Eukaryotic translation initiation factor 5A-1                                  | 0.40 |
| P19096   | Fatty acid synthase                                                            | 0.40 |
| Q9Z2X1   | Heterogeneous nuclear ribonucleoprotein F                                      | 0.40 |
| Q9EPL8   | Importin-7                                                                     | 0.40 |
| Q9JHU9   | Inositol-3-phosphate synthase 1                                                | 0.40 |
| Q9CXY6   | Interleukin enhancer-binding factor 2                                          | 0.40 |
| Q99MN1   | Lysine--tRNA ligase                                                            | 0.40 |
| O35286   | Putative pre-mRNA-splicing factor ATP-dependent RNA helicase DHX15             | 0.40 |
| P35486   | Pyruvate dehydrogenase E1 component subunit alpha_ somatic form_ mitochondrial | 0.40 |
| P80318   | T-complex protein 1 subunit gamma                                              | 0.40 |
| Q6ZWM4   | U6 snRNA-associated Sm-like protein LSm8                                       | 0.40 |
| P14131   | 40S ribosomal protein S16                                                      | 0.41 |
| P62855   | 40S ribosomal protein S26                                                      | 0.41 |
| Q99JY9   | Actin-related protein 3                                                        | 0.41 |
| Q99L45   | Eukaryotic translation initiation factor 2 subunit 2                           | 0.41 |
| Q9R0N0   | Galactokinase                                                                  | 0.41 |
| P16045   | Galectin-1                                                                     | 0.41 |
| Q921M3-2 | Isoform 2 of Splicing factor 3B subunit 3                                      | 0.41 |
| Q9WU78   | Programmed cell death 6-interacting protein                                    | 0.41 |
| Q91V89   | Protein Ppp2r5d                                                                | 0.41 |
| P52480   | Pyruvate kinase PKM                                                            | 0.41 |
| P62315   | Small nuclear ribonucleoprotein Sm D1                                          | 0.41 |

|            |                                                                  |      |
|------------|------------------------------------------------------------------|------|
| Q62261     | Spectrin beta chain_ non-erythrocytic 1                          | 0.41 |
| Q99JB2     | Stomatin-like protein 2_ mitochondrial                           | 0.41 |
| P05213     | Tubulin alpha-1B chain                                           | 0.41 |
| Q921H8     | 3-ketoacyl-CoA thiolase A_ peroxisomal                           | 0.42 |
| P62301     | 40S ribosomal protein S13                                        | 0.42 |
| P60867     | 40S ribosomal protein S20                                        | 0.42 |
| Q91V55     | 40S ribosomal protein S5                                         | 0.42 |
| P47962     | 60S ribosomal protein L5                                         | 0.42 |
| Q9DCD0     | 6-phosphogluconate dehydrogenase_ decarboxylating                | 0.42 |
| Q8CGC7     | Bifunctional glutamate/proline--tRNA ligase                      | 0.42 |
| Q91V12     | Cytosolic acyl coenzyme A thioester hydrolase                    | 0.42 |
| Q8QZY1     | Eukaryotic translation initiation factor 3 subunit L             | 0.42 |
| Q05D44     | Eukaryotic translation initiation factor 5B                      | 0.42 |
| P19157     | Glutathione S-transferase P 1                                    | 0.42 |
| P84104-2   | Isoform Short of Serine/arginine-rich splicing factor 3          | 0.42 |
| Q9QUR6     | Prolyl endopeptidase                                             | 0.42 |
| Q9R1P0     | Proteasome subunit alpha type-4                                  | 0.42 |
| P27773     | Protein disulfide-isomerase A3                                   | 0.42 |
| P97855     | Ras GTPase-activating protein-binding protein 1                  | 0.42 |
| Q78PY7     | Staphylococcal nuclease domain-containing protein 1              | 0.42 |
| Q60864     | Stress-induced-phosphoprotein 1                                  | 0.42 |
| P68368     | Tubulin alpha-4A chain                                           | 0.42 |
| Q8BYA0     | Tubulin-specific chaperone D                                     | 0.42 |
| Q91YR1     | Twinfilin-1                                                      | 0.42 |
| P61079     | Ubiquitin-conjugating enzyme E2 D3                               | 0.42 |
| D3Z061     | Ubiquitin-like modifier-activating enzyme 6                      | 0.42 |
| P62908     | 40S ribosomal protein S3                                         | 0.43 |
| P27659     | 60S ribosomal protein L3                                         | 0.43 |
| Q9D186     | Apolipoprotein O                                                 | 0.43 |
| Q9CWX9     | Bifunctional purine biosynthesis protein PURH                    | 0.43 |
| P70372     | ELAV-like protein 1                                              | 0.43 |
| A2AN08-3   | Isoform 3 of E3 ubiquitin-protein ligase UBR4                    | 0.43 |
| Q9Z204-4   | Isoform 4 of Heterogeneous nuclear ribonucleoproteins<br>C1/C2   | 0.43 |
| G3UWG1     | MCG115977                                                        | 0.43 |
| D3YU17     | Nicalin                                                          | 0.43 |
| P27048     | Small nuclear ribonucleoprotein-associated protein B             | 0.43 |
| Q921L3     | Transmembrane and coiled-coil domain-containing protein<br>1     | 0.43 |
| O35900     | U6 snRNA-associated Sm-like protein LSm2                         | 0.43 |
| Q02053     | Ubiquitin-like modifier-activating enzyme 1                      | 0.43 |
| P62270     | 40S ribosomal protein S18                                        | 0.44 |
| Q6ZWW3     | 60S ribosomal protein L10                                        | 0.44 |
| A0A087WP24 | Alpha/beta hydrolase domain-containing protein 14B<br>(Fragment) | 0.44 |
| Q9DBG3     | AP-2 complex subunit beta                                        | 0.44 |
| Q9DAW9     | Calponin-3                                                       | 0.44 |
| P70698     | CTP synthase 1                                                   | 0.44 |

|          |                                                               |      |
|----------|---------------------------------------------------------------|------|
| O70378   | ER membrane protein complex subunit 8                         | 0.44 |
| D3Z7P3   | Glutaminase kidney isoform_ mitochondrial                     | 0.44 |
| Q8VEK3   | Heterogeneous nuclear ribonucleoprotein U                     | 0.44 |
| P57776-2 | Isoform 2 of Elongation factor 1-delta                        | 0.44 |
| Q9MD82   | NADH-ubiquinone oxidoreductase chain 5                        | 0.44 |
| E9PWY9   | Phenylalanine--tRNA ligase alpha subunit                      | 0.44 |
| Q61656   | Probable ATP-dependent RNA helicase DDX5                      | 0.44 |
| Q91VI7   | Ribonuclease inhibitor                                        | 0.44 |
| P42669   | Transcriptional activator protein Pur-alpha                   | 0.44 |
| Q5SVW9   | Transmembrane emp24 domain-containing protein 4<br>(Fragment) | 0.44 |
| Q8C2E7   | WASH complex subunit strumpellin                              | 0.44 |
| Q9D2R0   | Acetoacetyl-CoA synthetase                                    | 0.45 |
| Q9CVB6   | Actin-related protein 2/3 complex subunit 2                   | 0.45 |
| P47738   | Aldehyde dehydrogenase_ mitochondrial                         | 0.45 |
| Q5SVG5   | AP complex subunit beta                                       | 0.45 |
| Q91V92   | ATP-citrate synthase                                          | 0.45 |
| Q63829   | COMM domain-containing protein 3                              | 0.45 |
| P68040   | Guanine nucleotide-binding protein subunit beta-2-like 1      | 0.45 |
| Q61425   | Hydroxyacyl-coenzyme A dehydrogenase_ mitochondrial           | 0.45 |
| Q9CPY7-2 | Isoform 2 of Cytosol aminopeptidase                           | 0.45 |
| Q8K1M6-3 | Isoform 3 of Dynamin-1-like protein                           | 0.45 |
| Q9CPQ3   | Mitochondrial import receptor subunit TOM22 homolog           | 0.45 |
| P50543   | Protein S100-A11                                              | 0.45 |
| P62317   | Small nuclear ribonucleoprotein Sm D2                         | 0.45 |
| Q9EQH3   | Vacuolar protein sorting-associated protein 35                | 0.45 |
| P62192   | 26S protease regulatory subunit 4                             | 0.46 |
| P48962   | ADP/ATP translocase 1                                         | 0.46 |
| Q9CQ69   | Cytochrome b-c1 complex subunit 8                             | 0.46 |
| D3YVN7   | Elongation factor Tu                                          | 0.46 |
| E9PVC6   | Eukaryotic translation initiation factor 4 gamma 1            | 0.46 |
| P47754   | F-actin-capping protein subunit alpha-2                       | 0.46 |
| Q64152-2 | Isoform 2 of Transcription factor BTF3                        | 0.46 |
| O35682   | Myeloid-associated differentiation marker                     | 0.46 |
| P26883   | Peptidyl-prolyl cis-trans isomerase FKBP1A                    | 0.46 |
| O55234   | Proteasome subunit beta type-5                                | 0.46 |
| Q8VHN8   | Protein syndesmos                                             | 0.46 |
| O08583   | THO complex subunit 4                                         | 0.46 |
| Q9JK81   | UPF0160 protein MYG1_ mitochondrial                           | 0.46 |
| B1AU25   | Apoptosis-inducing factor 1_ mitochondrial                    | 0.47 |
| Q922B2   | Aspartate--tRNA ligase_ cytoplasmic                           | 0.47 |
| Q64525   | Histone H2B type 2-B                                          | 0.47 |
| Q91VA7   | Isocitrate dehydrogenase [NAD] subunit_ mitochondrial         | 0.47 |
| P06151   | L-lactate dehydrogenase A chain                               | 0.47 |
| Q61171   | Peroxiredoxin-2                                               | 0.47 |
| B2RXS4   | Plexin-B2                                                     | 0.47 |
| O35129   | Prohibitin-2                                                  | 0.47 |

|          |                                                                                           |      |
|----------|-------------------------------------------------------------------------------------------|------|
| Q60692   | Proteasome subunit beta type-6                                                            | 0.47 |
| Q80ZX0   | Protein Sec24b                                                                            | 0.47 |
| P62305   | Small nuclear ribonucleoprotein E                                                         | 0.47 |
| D3Z7P2   | Transmembrane protein 109 (Fragment)                                                      | 0.47 |
| Q99JI4   | 26S proteasome non-ATPase regulatory subunit 6                                            | 0.48 |
| Q6ZWW6   | 40S ribosomal protein S12                                                                 | 0.48 |
| P63276   | 40S ribosomal protein S17                                                                 | 0.48 |
| Q9D3D9   | ATP synthase subunit delta_ mitochondrial                                                 | 0.48 |
| Q99KK7   | Dipeptidyl peptidase 3                                                                    | 0.48 |
| P62748   | Hippocalcin-like protein 1                                                                | 0.48 |
| E9QKZ2   | Importin-9                                                                                | 0.48 |
| Q8BGJ5   | MCG13402_ isoform CRA_a                                                                   | 0.48 |
| Q99KE1   | NAD-dependent malic enzyme_ mitochondrial                                                 | 0.48 |
| Q8BHN3   | Neutral alpha-glucosidase AB                                                              | 0.48 |
| Q9QUM9   | Proteasome subunit alpha type-6                                                           | 0.48 |
| Q99PT1   | Rho GDP-dissociation inhibitor 1                                                          | 0.48 |
| Q5FWK3   | Rho GTPase-activating protein 1                                                           | 0.48 |
| Q9D0K2   | Succinyl-CoA:3-ketoacid coenzyme A transferase 1_ mitochondrial                           | 0.48 |
| Q3TW96   | UDP-N-acetylhexosamine pyrophosphorylase-like protein 1                                   | 0.48 |
| Q6ZWU9   | 40S ribosomal protein S27                                                                 | 0.49 |
| P10852   | 4F2 cell-surface antigen heavy chain                                                      | 0.49 |
| Q9WTL7   | Acyl-protein thioesterase 2                                                               | 0.49 |
| P51881   | ADP/ATP translocase 2                                                                     | 0.49 |
| O08553   | Dihydropyrimidinase-related protein 2                                                     | 0.49 |
| Q9D7X3   | Dual specificity protein phosphatase 3                                                    | 0.49 |
| Q99KJ8   | Dynactin subunit 2                                                                        | 0.49 |
| Q8BWY3   | Eukaryotic peptide chain release factor subunit 1                                         | 0.49 |
| Q8BMJ3   | Eukaryotic translation initiation factor 1A_ X-chromosomal                                | 0.49 |
| Q9Z0N1   | Eukaryotic translation initiation factor 2 subunit 3_ X-linked                            | 0.49 |
| Q3U0V1   | Far upstream element-binding protein 2                                                    | 0.49 |
| P62849-2 | Isoform 2 of 40S ribosomal protein S24                                                    | 0.49 |
| Q9D0M3-2 | Isoform 2 of Cytochrome c1_ heme protein_ mitochondrial                                   | 0.49 |
| P03899   | NADH-ubiquinone oxidoreductase chain 3                                                    | 0.49 |
| Q501J6   | Probable ATP-dependent RNA helicase DDX17                                                 | 0.49 |
| D3Z0A2   | Protein arginine N-methyltransferase 1                                                    | 0.49 |
| P14069   | Protein S100-A6                                                                           | 0.49 |
| P61027   | Ras-related protein Rab-10                                                                | 0.49 |
| P99024   | Tubulin beta-5 chain                                                                      | 0.49 |
| Q99N15   | 17beta-hydroxysteroid dehydrogenase type 10/short chain L-3-hydroxyacyl-CoA dehydrogenase | 0.50 |
| Q60597   | 2-oxoglutarate dehydrogenase_ mitochondrial                                               | 0.50 |
| Q5EG47   | 5'-AMP-activated protein kinase catalytic subunit alpha-1                                 | 0.50 |
| P60710   | Actin_ cytoplasmic 1                                                                      | 0.50 |
| Q7TPR4   | Alpha-actinin-1                                                                           | 0.50 |
| D3YW48   | Calpain small subunit 1 (Fragment)                                                        | 0.50 |

|          |                                                                                        |      |
|----------|----------------------------------------------------------------------------------------|------|
| Q9CZU6   | Citrate synthase_ mitochondrial                                                        | 0.50 |
| Q6ZQ38   | Cullin-associated NEDD8-dissociated protein 1                                          | 0.50 |
| P58252   | Elongation factor 2                                                                    | 0.50 |
| G3XA10   | Heterogeneous nuclear ribonucleoprotein U_ isoform<br>CRA_b                            | 0.50 |
| Q9JKR6   | Hypoxia up-regulated protein 1                                                         | 0.50 |
| Q8CHK3   | Lysophospholipid acyltransferase 7                                                     | 0.50 |
| Q69ZN7   | Myoferlin                                                                              | 0.50 |
| Q9DCT2   | NADH dehydrogenase [ubiquinone] iron-sulfur protein 3_<br>mitochondrial                | 0.50 |
| O70400   | PDZ and LIM domain protein 1                                                           | 0.50 |
| Q11011   | Puromycin-sensitive aminopeptidase                                                     | 0.50 |
| P20108   | Thioredoxin-dependent peroxide reductase_ mitochondrial                                | 0.50 |
| Q9WVA4   | Transgelin-2                                                                           | 0.50 |
| P62274   | 40S ribosomal protein S29                                                              | 0.51 |
| P61164   | Alpha-centractin                                                                       | 0.51 |
| Q64133   | Amine oxidase [flavin-containing] A                                                    | 0.51 |
| F8WHP8   | ATP synthase subunit f_ mitochondrial                                                  | 0.51 |
| Q91VR5   | ATP-dependent RNA helicase DDX1                                                        | 0.51 |
| P56380   | Bis(5'-nucleosyl)-tetraphosphatase [asymmetrical]                                      | 0.51 |
| Q8BH59   | Calcium-binding mitochondrial carrier protein Aralar1                                  | 0.51 |
| Q01149   | Collagen alpha-2(I) chain                                                              | 0.51 |
| Q9CZ04   | COP9 signalosome complex subunit 7a                                                    | 0.51 |
| Q9DB77   | Cytochrome b-c1 complex subunit 2_ mitochondrial                                       | 0.51 |
| Q7JCZ1   | Cytochrome c oxidase subunit 2                                                         | 0.51 |
| P10630   | Eukaryotic initiation factor 4A-II                                                     | 0.51 |
| Q3UEB3-3 | Isoform 3 of Poly(U)-binding-splicing factor PUF60                                     | 0.51 |
| Q61768   | Kinesin-1 heavy chain                                                                  | 0.51 |
| Q9EQK5   | Major vault protein                                                                    | 0.51 |
| P49722   | Proteasome subunit alpha type-2                                                        | 0.51 |
| O70435   | Proteasome subunit alpha type-3                                                        | 0.51 |
| E9PZ69   | Transmembrane 9 superfamily member 2                                                   | 0.51 |
| Q922F4   | Tubulin beta-6 chain                                                                   | 0.51 |
| P68037   | Ubiquitin-conjugating enzyme E2 L3                                                     | 0.51 |
| Q9R0Y5   | Adenylate kinase isoenzyme 1                                                           | 0.52 |
| B0R091   | Calcineurin B homologous protein 1                                                     | 0.52 |
| O88587   | Catechol O-methyltransferase                                                           | 0.52 |
| Q8VBZ3   | Cleft lip and palate transmembrane protein 1 homolog                                   | 0.52 |
| Q9QZE5   | Coatomer subunit gamma-1                                                               | 0.52 |
| Q9WVK4   | EH domain-containing protein 1                                                         | 0.52 |
| O35737   | Heterogeneous nuclear ribonucleoprotein H                                              | 0.52 |
| Q9QYB1   | Chloride intracellular channel protein 4                                               | 0.52 |
| Q60766-2 | Isoform 2 of Immunity-related GTPase family M protein 1                                | 0.52 |
| Q99LB6-2 | Isoform 2 of Methionine adenosyltransferase 2 subunit beta                             | 0.52 |
| P28660-2 | Isoform 2 of Nck-associated protein 1                                                  | 0.52 |
| Q8BJU0-2 | Isoform 2 of Small glutamine-rich tetratricopeptide<br>repeat-containing protein alpha | 0.52 |
| P08249   | Malate dehydrogenase_ mitochondrial                                                    | 0.52 |

|            |                                                                                                                 |      |
|------------|-----------------------------------------------------------------------------------------------------------------|------|
| P26041     | Moesin                                                                                                          | 0.52 |
| Q9DCS9     | NADH dehydrogenase [ubiquinone] 1 beta subcomplex subunit 10                                                    | 0.52 |
| Q9D8S4     | Oligoribonuclease_mitochondrial                                                                                 | 0.52 |
| P50396     | Rab GDP dissociation inhibitor alpha                                                                            | 0.52 |
| Q9CQD1     | Ras-related protein Rab-5A                                                                                      | 0.52 |
| D3YWT0     | Signal peptidase I                                                                                              | 0.52 |
| Q9JHJ0     | Tropomodulin-3                                                                                                  | 0.52 |
| P23927     | Alpha-crystallin B chain                                                                                        | 0.53 |
| Q3TWW4     | AP-2 complex subunit mu                                                                                         | 0.53 |
| P05202     | Aspartate aminotransferase_mitochondrial                                                                        | 0.53 |
| Q9D2G2     | Dihydrolipoyllysine-residue succinyltransferase component of 2-oxoglutarate dehydrogenase complex_mitochondrial | 0.53 |
| P61804     | Dolichyl-diphosphooligosaccharide--protein glycosyltransferase subunit DAD1                                     | 0.53 |
| P42125     | Enoyl-CoA delta isomerase 1_mitochondrial                                                                       | 0.53 |
| P70333     | Heterogeneous nuclear ribonucleoprotein H2                                                                      | 0.53 |
| P97823-2   | Isoform 2 of Acyl-protein thioesterase 1                                                                        | 0.53 |
| P37889-2   | Isoform 2 of Fibulin-2                                                                                          | 0.53 |
| A0A087WNW3 | Kinectin                                                                                                        | 0.53 |
| A0A0A6YW67 | MCG23377_isoform CRA_b                                                                                          | 0.53 |
| P29595     | NEDD8                                                                                                           | 0.53 |
| Q8BH04     | Phosphoenolpyruvate carboxykinase [GTP]_mitochondrial                                                           | 0.53 |
| D3Z645     | Vacuolar protein sorting-associated protein 29                                                                  | 0.53 |
| B1AR28     | Very long-chain-specific acyl-CoA dehydrogenase_mitochondrial                                                   | 0.53 |
| P62814     | V-type proton ATPase subunit B_brain isoform                                                                    | 0.53 |
| O88342     | WD repeat-containing protein 1                                                                                  | 0.53 |
| Q9Z2W0     | Aspartyl aminopeptidase                                                                                         | 0.54 |
| O35350     | Calpain-1 catalytic subunit                                                                                     | 0.54 |
| P10605     | Cathepsin B                                                                                                     | 0.54 |
| P19783     | Cytochrome c oxidase subunit 4 isoform 1_mitochondrial                                                          | 0.54 |
| Q61753     | D-3-phosphoglycerate dehydrogenase                                                                              | 0.54 |
| H3BLR8     | Diphosphoinositol polyphosphate phosphohydrolase 1                                                              | 0.54 |
| A0A087WR50 | Fibronectin                                                                                                     | 0.54 |
| P14602     | Heat shock protein beta-1                                                                                       | 0.54 |
| Q8C3X8     | Lipase maturation factor 2                                                                                      | 0.54 |
| Q9CQ75     | NADH dehydrogenase [ubiquinone] 1 alpha subcomplex subunit 2                                                    | 0.54 |
| Q8K3J1     | NADH dehydrogenase [ubiquinone] iron-sulfur protein 8_mitochondrial                                             | 0.54 |
| Q8CI51     | PDZ and LIM domain protein 5                                                                                    | 0.54 |
| P35700     | Peroxiredoxin-1                                                                                                 | 0.54 |
| D3Z2X5     | Platelet-activating factor acetylhydrolase IB subunit gamma (Fragment)                                          | 0.54 |
| Q8VE70     | Programmed cell death protein 10                                                                                | 0.54 |
| Q9R1P1     | Proteasome subunit beta type-3                                                                                  | 0.54 |

|            |                                                                      |      |
|------------|----------------------------------------------------------------------|------|
| P08207     | Protein S100-A10                                                     | 0.54 |
| Q921E2     | Ras-related protein Rab-31                                           | 0.54 |
| P51150     | Ras-related protein Rab-7a                                           | 0.54 |
| Q9CYN2     | Signal peptidase complex subunit 2                                   | 0.54 |
| Q61263     | Sterol O-acyltransferase 1                                           | 0.54 |
| Q9CQW1     | Synaptobrevin homolog YKT6                                           | 0.54 |
| A0A087WQE6 | Transcription elongation factor B polypeptide 1 (Fragment)           | 0.54 |
| Q9Z1Q9     | Valine--tRNA ligase                                                  | 0.54 |
| G3XA25     | Acetyl-CoA acetyltransferase_ cytosolic                              | 0.55 |
| P61161     | Actin-related protein 2                                              | 0.55 |
| P61750     | ADP-ribosylation factor 4                                            | 0.55 |
| Q9QWR8     | Alpha-N-acetylgalactosaminidase                                      | 0.55 |
| Q8VCQ8     | Caldesmon 1                                                          | 0.55 |
| Q8BXC6     | COMM domain-containing protein 2                                     | 0.55 |
| Q8R395     | COMM domain-containing protein 5                                     | 0.55 |
| Q8R1B4     | Eukaryotic translation initiation factor 3 subunit C                 | 0.55 |
| Q00612     | Glucose-6-phosphate 1-dehydrogenase X                                | 0.55 |
| P26443     | Glutamate dehydrogenase 1_ mitochondrial                             | 0.55 |
| Q62470     | Integrin alpha-3                                                     | 0.55 |
| P68254-2   | Isoform 2 of 14-3-3 protein theta                                    | 0.55 |
| Q9DCF9-2   | Isoform 2 of Translocon-associated protein subunit gamma             | 0.55 |
| Q7M739     | Nuclear pore complex-associated intranuclear coiled-coil protein TPR | 0.55 |
| Q8VEM8     | Phosphate carrier protein_ mitochondrial                             | 0.55 |
| Q9R0E1     | Procollagen-lysine_2-oxoglutarate 5-dioxygenase 3                    | 0.55 |
| O88952     | Protein lin-7 homolog C                                              | 0.55 |
| P46638     | Ras-related protein Rab-11B                                          | 0.55 |
| O55131     | Septin-7                                                             | 0.55 |
| Q91V61     | Sideroflexin-3                                                       | 0.55 |
| Q9QUI0     | Transforming protein RhoA                                            | 0.55 |
| Q9QZE7     | Translin-associated protein X                                        | 0.55 |
| Q9CY50     | Translocon-associated protein subunit alpha                          | 0.55 |
| Q8BMS1     | Trifunctional enzyme subunit alpha_ mitochondrial                    | 0.55 |
| Q8VDJ3     | Vigilin                                                              | 0.55 |
| P20152     | Vimentin                                                             | 0.55 |
| Q99KI0     | Aconitate hydratase_ mitochondrial                                   | 0.56 |
| P50247     | Adenosylhomocysteinase                                               | 0.56 |
| Q9JII6     | Alcohol dehydrogenase [NADP(+)]                                      | 0.56 |
| Q07076     | Annexin A7                                                           | 0.56 |
| Q8R180     | ERO1-like protein alpha                                              | 0.56 |
| P13020-2   | Isoform 2 of Gelsolin                                                | 0.56 |
| Q9DCN2-2   | Isoform 2 of NADH-cytochrome b5 reductase 3                          | 0.56 |
| Q6ZWQ9     | MCG5400                                                              | 0.56 |
| Q9CQ54     | NADH dehydrogenase [ubiquinone] 1 subunit C2                         | 0.56 |
| Q99PV0     | Pre-mRNA-processing-splicing factor 8                                | 0.56 |
| P08003     | Protein disulfide-isomerase A4                                       | 0.56 |
| O89086     | RNA-binding protein 3                                                | 0.56 |

|          |                                                                      |      |
|----------|----------------------------------------------------------------------|------|
| P42208   | Septin-2                                                             | 0.56 |
| Q6PDM2   | Serine/arginine-rich splicing factor 1                               | 0.56 |
| Q9CWK8   | Sorting nexin-2                                                      | 0.56 |
| P61089   | Ubiquitin-conjugating enzyme E2 N                                    | 0.56 |
| P62889   | 60S ribosomal protein L30                                            | 0.57 |
| Q9ET22   | Dipeptidyl peptidase 2                                               | 0.57 |
| Q8CFQ9   | Fusion_ derived from t(1216) malignant liposarcoma<br>(Human)        | 0.57 |
| Q9DBF1-2 | Isoform 2 of Alpha-aminoadipic semialdehyde<br>dehydrogenase         | 0.57 |
| Q8K310   | Matrin-3                                                             | 0.57 |
| Q9ERS2   | NADH dehydrogenase [ubiquinone] 1 alpha subcomplex<br>subunit 13     | 0.57 |
| Q9DBG5   | Perilipin-3                                                          | 0.57 |
| D3Z074   | Protein diaphanous homolog 1                                         | 0.57 |
| Q9WVE8   | Protein kinase C and casein kinase substrate in neurons<br>protein 2 | 0.57 |
| P63001   | Ras-related C3 botulinum toxin substrate 1                           | 0.57 |
| Q9DBH5   | Vesicular integral-membrane protein VIP36                            | 0.57 |
| P50518   | V-type proton ATPase subunit E 1                                     | 0.57 |
| Q8BG32   | 26S proteasome non-ATPase regulatory subunit 11                      | 0.58 |
| P14685   | 26S proteasome non-ATPase regulatory subunit 3                       | 0.58 |
| P35762   | CD81 antigen                                                         | 0.58 |
| Q8BML9   | Glutaminyl-tRNA synthetase                                           | 0.58 |
| Q9Z1Q5   | Chloride intracellular channel protein 1                             | 0.58 |
| P51174   | Long-chain specific acyl-CoA dehydrogenase_<br>mitochondrial         | 0.58 |
| P34884   | Macrophage migration inhibitory factor                               | 0.58 |
| Q9D7B7   | Probable glutathione peroxidase 8                                    | 0.58 |
| P62137   | Serine/threonine-protein phosphatase PP1-alpha catalytic<br>subunit  | 0.58 |
| P54775   | 26S protease regulatory subunit 6B                                   | 0.59 |
| P57780   | Alpha-actinin-4                                                      | 0.59 |
| Q9Z1T1   | AP-3 complex subunit beta-1                                          | 0.59 |
| P34914   | Bifunctional epoxide hydrolase 2                                     | 0.59 |
| O55029   | Coatomer subunit beta'                                               | 0.59 |
| P01027   | Complement C3                                                        | 0.59 |
| Q62425   | Cytochrome c oxidase subunit NDUFA4                                  | 0.59 |
| Q9JHU4   | Cytoplasmic dynein 1 heavy chain 1                                   | 0.59 |
| P29387   | Guanine nucleotide-binding protein subunit beta-4                    | 0.59 |
| Q9DBJ1   | Phosphoglycerate mutase 1                                            | 0.59 |
| P07091   | Protein S100-A4                                                      | 0.59 |
| Q9D051   | Pyruvate dehydrogenase E1 component subunit beta_<br>mitochondrial   | 0.59 |
| P26043   | Radixin                                                              | 0.59 |
| P35293   | Ras-related protein Rab-18                                           | 0.59 |
| Q99JR1   | Sideroflexin-1                                                       | 0.59 |
| P62281   | 40S ribosomal protein S11                                            | 0.60 |



|          |                                                                          |      |
|----------|--------------------------------------------------------------------------|------|
| P51410   | 60S ribosomal protein L9                                                 | 0.60 |
| P24668   | Cation-dependent mannose-6-phosphate receptor                            | 0.60 |
| Q4KML4   | Costars family protein ABRACL                                            | 0.60 |
| Q9DCT8   | Cysteine-rich protein 2                                                  | 0.60 |
| Q8BH64   | EH domain-containing protein 2                                           | 0.60 |
| Q9DCW4   | Electron transfer flavoprotein subunit beta                              | 0.60 |
| Q9WTP7   | GTP:AMP phosphotransferase AK3_ mitochondrial                            | 0.60 |
| P08752   | Guanine nucleotide-binding protein G(i) subunit alpha-2                  | 0.60 |
| Q60973   | Histone-binding protein RBBP7                                            | 0.60 |
| P14152   | Malate dehydrogenase_ cytoplasmic                                        | 0.60 |
| Q9CQC7   | NADH dehydrogenase [ubiquinone] 1 beta subcomplex subunit 4              | 0.60 |
| P57716   | Nicastrin                                                                | 0.60 |
| Q9CQ65   | S-methyl-5'-thioadenosine phosphorylase                                  | 0.60 |
| Q64310   | Surfeit locus protein 4                                                  | 0.60 |
| Q62186   | Translocon-associated protein subunit delta                              | 0.60 |
| Q7TMM9   | Tubulin beta-2A chain                                                    | 0.60 |
| O70475   | UDP-glucose 6-dehydrogenase                                              | 0.60 |
| Q6ZQM8   | UDP-glucuronosyltransferase 1-7C                                         | 0.60 |
| Q9CY27   | Very-long-chain enoyl-CoA reductase                                      | 0.60 |
| P56480   | ATP synthase subunit beta_ mitochondrial                                 | 0.61 |
| Q8VDW0   | ATP-dependent RNA helicase DDX39A                                        | 0.61 |
| O08529   | Calpain-2 catalytic subunit                                              | 0.61 |
| Q9D379   | Epoxide hydrolase 1                                                      | 0.61 |
| Q3U7R1   | Extended synaptotagmin-1                                                 | 0.61 |
| Q8CI94   | Glycogen phosphorylase_ brain form                                       | 0.61 |
| O88844   | Isocitrate dehydrogenase [NADP] cytoplasmic                              | 0.61 |
| Q9D7S7-2 | Isoform 2 of 60S ribosomal protein L22-like 1                            | 0.61 |
| Q05BC3-2 | Isoform 2 of Echinoderm microtubule-associated protein-like 1            | 0.61 |
| Q6ZQI3   | Malectin                                                                 | 0.61 |
| Q80UU9   | Membrane-associated progesterone receptor component 2                    | 0.61 |
| O35683   | NADH dehydrogenase [ubiquinone] 1 alpha subcomplex subunit 1             | 0.61 |
| Q99K48   | Non-POU domain-containing octamer-binding protein                        | 0.61 |
| P35282   | Ras-related protein Rab-21                                               | 0.61 |
| Q91ZR1   | Ras-related protein Rab-4B                                               | 0.61 |
| Q07417   | Short-chain specific acyl-CoA dehydrogenase_ mitochondrial               | 0.61 |
| P62983   | Ubiquitin-40S ribosomal protein S27a                                     | 0.61 |
| O35593   | 26S proteasome non-ATPase regulatory subunit 14                          | 0.62 |
| P68134   | Actin_ alpha skeletal muscle                                             | 0.62 |
| P17427   | AP-2 complex subunit alpha-2                                             | 0.62 |
| Q02248   | Catenin beta-1                                                           | 0.62 |
| P60766   | Cell division control protein 42 homolog                                 | 0.62 |
| Q9WUM4   | Coronin-1C                                                               | 0.62 |
| Q91YQ5   | Dolichyl-diphosphooligosaccharide--protein glycosyltransferase subunit 1 | 0.62 |

|          |                                                                         |      |
|----------|-------------------------------------------------------------------------|------|
| Q8BH95   | Enoyl-CoA hydratase_ mitochondrial                                      | 0.62 |
| P21107-2 | Isoform 2 of Tropomyosin alpha-3 chain                                  | 0.62 |
| Q80SW1   | Putative adenosylhomocysteinase 2                                       | 0.62 |
| Q9D031   | Ras suppressor protein 1                                                | 0.62 |
| P10833   | Ras-related protein R-Ras                                               | 0.62 |
| Q9CQA3   | Succinate dehydrogenase [ubiquinone] iron-sulfur subunit_ mitochondrial | 0.62 |
| P68510   | 14-3-3 protein eta                                                      | 0.63 |
| A1BN54   | Alpha actinin 1a                                                        | 0.63 |
| P27046   | Alpha-mannosidase 2                                                     | 0.63 |
| Q9CZ13   | Cytochrome b-c1 complex subunit 1_ mitochondrial                        | 0.63 |
| Q9R0P5   | Dextrin                                                                 | 0.63 |
| Q3THW5   | Histone H2A.V                                                           | 0.63 |
| Q61598-2 | Isoform 2 of Rab GDP dissociation inhibitor beta                        | 0.63 |
| Q6P069-2 | Isoform 2 of Sorcin                                                     | 0.63 |
| P11881-8 | Isoform 8 of Inositol 1_4_5-trisphosphate receptor type 1               | 0.63 |
| Q61033   | Lamina-associated polypeptide 2_ isoforms alpha/zeta                    | 0.63 |
| Q7TMF3   | NADH dehydrogenase [ubiquinone] 1 alpha subcomplex subunit 12           | 0.63 |
| F8VPK5   | Rho-associated protein kinase                                           | 0.63 |
| Q64105   | Sepiapterin reductase                                                   | 0.63 |
| P09671   | Superoxide dismutase [Mn]_ mitochondrial                                | 0.63 |
| O08547   | Vesicle-trafficking protein SEC22b                                      | 0.63 |
| P23780   | Beta-galactosidase                                                      | 0.64 |
| Q9CQI6   | Coactosin-like protein                                                  | 0.64 |
| Q9CPQ1   | Cytochrome c oxidase subunit 6C                                         | 0.64 |
| F7A6H4   | E3 ubiquitin-protein ligase RNF213                                      | 0.64 |
| Q9CPX4   | Ferritin                                                                | 0.64 |
| E9Q1S3   | Heterogeneous nuclear ribonucleoprotein K (Fragment)                    | 0.64 |
| P24527   | Leukotriene A-4 hydrolase                                               | 0.64 |
| Q7TPV4   | Myb-binding protein 1A                                                  | 0.64 |
| Q91V41   | Ras-related protein Rab-14                                              | 0.64 |
| A2AVJ7   | Ribosome-binding protein 1                                              | 0.64 |
| E9PXX7   | Thioredoxin domain-containing protein 5                                 | 0.64 |
| Q99JY0   | Trifunctional enzyme subunit beta_ mitochondrial                        | 0.64 |
| Q9WTI7   | Unconventional myosin-Ic                                                | 0.64 |
| Q9DCR2   | AP-3 complex subunit sigma-1                                            | 0.65 |
| P97742   | Carnitine O-palmitoyltransferase 1_ liver isoform                       | 0.65 |
| Q8CIE6   | Coatomer subunit alpha                                                  | 0.65 |
| Q8VHX6   | Filamin-C                                                               | 0.65 |
| F6SAC3   | Glucose-6-phosphate isomerase                                           | 0.65 |
| Q61696   | Heat shock 70 kDa protein 1A                                            | 0.65 |
| Q3UPL0-2 | Isoform 2 of Protein transport protein Sec31A                           | 0.65 |
| P85094   | Isochorismatase domain-containing protein 2A_ mitochondrial             | 0.65 |
| P06795   | Multidrug resistance protein 1B                                         | 0.65 |
| P29341   | Polyadenylate-binding protein 1                                         | 0.65 |
| Q922R8   | Protein disulfide-isomerase A6                                          | 0.65 |

|          |                                                                         |      |
|----------|-------------------------------------------------------------------------|------|
| Q3TCN2   | Putative phospholipase B-like 2                                         | 0.65 |
| D3Z3A9   | Reticulocalbin-3 (Fragment)                                             | 0.65 |
| P62717   | 60S ribosomal protein L18a                                              | 0.66 |
| F8WIT2   | Annexin                                                                 | 0.66 |
| O35841   | Apoptosis inhibitor 5                                                   | 0.66 |
| G5E850   | Cytochrome b-5_ isoform CRA_a                                           | 0.66 |
| G3X9L6   | MCG55033                                                                | 0.66 |
| P80313   | T-complex protein 1 subunit eta                                         | 0.66 |
| P58871   | 182 kDa tankyrase-1-binding protein                                     | 0.67 |
| Q9JIF7   | Coatomer subunit beta                                                   | 0.67 |
| P62880   | Guanine nucleotide-binding protein G(I)/G(S)/G(T) subunit beta-2        | 0.67 |
| P70699   | Lysosomal alpha-glucosidase                                             | 0.67 |
| Q9CQS8   | Protein transport protein Sec61 subunit beta                            | 0.67 |
| Q9R0M6   | Ras-related protein Rab-9A                                              | 0.67 |
| Q8VIJ6   | Splicing factor_ proline- and glutamine-rich                            | 0.67 |
| Q8JZU2   | Tricarboxylate transport protein_ mitochondrial                         | 0.67 |
| Q91ZJ5   | UTP--glucose-1-phosphate uridylyltransferase                            | 0.67 |
| P46935   | E3 ubiquitin-protein ligase NEDD4                                       | 0.68 |
| P39054-2 | Isoform 2 of Dynamin-2                                                  | 0.68 |
| Q9R1P3   | Proteasome subunit beta type-2                                          | 0.68 |
| P63024   | Vesicle-associated membrane protein 3                                   | 0.68 |
| G3X9U9   | Fission 1 (Mitochondrial outer membrane) homolog (Yeast)_ isoform CRA_c | 0.69 |
| O88322   | Nidogen-2                                                               | 0.69 |
| Q61316   | Heat shock 70 kDa protein 4                                             | 0.70 |
| A2AKI5   | Integrin alpha-V                                                        | 0.70 |
| Q8BU30   | Isoleucine--tRNA ligase_ cytoplasmic                                    | 0.70 |
| P59383   | Leucine-rich repeat neuronal protein 4                                  | 0.70 |
| Q6A099   | MKIAA0248 protein (Fragment)                                            | 0.70 |
| P08228   | Superoxide dismutase [Cu-Zn]                                            | 0.70 |
| A2AKU9   | ATP synthase subunit gamma                                              | 0.71 |
| Q3UF75   | Alpha-parvin                                                            | 0.72 |
| F8WHM5   | Golgi apparatus protein 1 (Fragment)                                    | 0.72 |
| Q62426   | Cystatin-B                                                              | 0.73 |
| Q9ERN0   | Secretory carrier-associated membrane protein 2                         | 0.73 |

---

**Table S4.** Differentially expressed proteins during transmigration of MIM-RT cells.

| <b>Uniprot ID</b> | <b>Description</b>                                           | <b>Expression Ratio Sample/Control</b> |
|-------------------|--------------------------------------------------------------|----------------------------------------|
| Q922R8            | Protein disulfide-isomerase A6                               | 1.36                                   |
| Q80ZJ2            | Impa1 protein                                                | 1.35                                   |
| P19157            | Glutathione S-transferase P 1                                | 1.24                                   |
| P62911            | 60S ribosomal protein L32                                    | 0.50                                   |
| Q543K9            | Purine nucleoside phosphorylase                              | 0.51                                   |
| P61222            | ATP-binding cassette sub-family E member 1                   | 0.54                                   |
| P26443            | Glutamate dehydrogenase 1_ mitochondrial                     | 0.54                                   |
| P14901            | Heme oxygenase 1                                             | 0.65                                   |
| P63028            | Translationally-controlled tumor protein                     | 0.65                                   |
| P07356            | Annexin A2                                                   | 0.66                                   |
| D3YWF6            | Ubiquitin thioesterase OTUB1                                 | 0.66                                   |
| E9Q616            | Protein Ahnak                                                | 0.67                                   |
| Q60973            | Histone-binding protein RBBP7                                | 0.68                                   |
| P55264-2          | Isoform Short of Adenosine kinase                            | 0.68                                   |
| Q99LB4            | Capping protein (Actin filament)_ gelsolin-like              | 0.69                                   |
| Q9Z1Q5            | Chloride intracellular channel protein 1                     | 0.70                                   |
| Q9CPU0            | Lactoylglutathione lyase                                     | 0.70                                   |
| Q8VHX6            | Filamin-C                                                    | 0.72                                   |
| Q7TPV4            | Myb-binding protein 1A                                       | 0.72                                   |
| Q6GT24            | Peroxiredoxin 6                                              | 0.72                                   |
| P10639            | Thioredoxin                                                  | 0.74                                   |
| P47962            | 60S ribosomal protein L5                                     | 0.75                                   |
| Q9JHU4            | Cytoplasmic dynein 1 heavy chain 1                           | 0.75                                   |
| P57776            | Elongation factor 1-delta                                    | 0.75                                   |
| P57776-2          | Isoform 2 of Elongation factor 1-delta                       | 0.75                                   |
| Z4YKM2            | CDGSH iron-sulfur domain-containing protein 3_ mitochondrial | 0.76                                   |
| Q91V41            | Ras-related protein Rab-14                                   | 0.76                                   |
| P26638            | Serine--tRNA ligase_ cytoplasmic                             | 0.76                                   |
| Q9DB20            | ATP synthase subunit O_ mitochondrial                        | 0.77                                   |
| Q9CXW3            | Calcyclin-binding protein                                    | 0.77                                   |
| P14211            | Calreticulin                                                 | 0.77                                   |
| Q9D8N0            | Elongation factor 1-gamma                                    | 0.77                                   |
| P54071            | Isocitrate dehydrogenase [NADP]_ mitochondrial               | 0.77                                   |
| Q8BP67            | 60S ribosomal protein L24                                    | 0.80                                   |
| Q64525            | Histone H2B type 2-B                                         | 0.80                                   |
| P05202            | Aspartate aminotransferase_ mitochondrial                    | 0.83                                   |
